# Supplementary material
Source: PubMed Central journal article supplement (PMC4959465)
Supplement: NIHMS802892-supplement-supplement_1.pdf [file NIHMS802892-supplement-supplement_1.pdf]

Supplemental Information for

## **Light-Triggered Release of Bioactive Molecules from DNA Nanostructures**

Richie E. Kohman<sup>1</sup>, Susie S. Cha<sup>1</sup>, Heng-Ye Man<sup>2</sup>, Xue Han<sup>1\*</sup>

<sup>1</sup>Biomedical Engineering Department, Boston University, Boston, MA, USA.

<sup>2</sup>Biology Department, Boston University, Boston, MA, USA.

### **Experimental Section**

#### **Cross-linker 1 synthesis (Scheme 1):**

Reactions were monitored by TLC using glass-backed silica gel 60 F254 plates. Flash chromatography was performed in a quartz column with a fluorescent indicator (green 254 nm) added to the silica gel. TLC bands were visualized by UV. Solvent ratios used as elutants are reported in v/v. The purity of the final products was obtained through <sup>1</sup>H NMR and <sup>13</sup>C NMR.

<sup>1</sup>H NMR data were obtained on a 500 MHz Varian VMNRS spectrophotometer at the Chemical Instrumentation Center at Boston University. Chemical shifts are reported in parts per million (ppm) and coupling constants were reported in Hertz (Hz). <sup>1</sup>H NMR spectra obtained in CDCl<sub>3</sub> were referenced to 7.26 ppm and those obtained in DMSO-d<sub>6</sub> were referenced to 2.50 ppm. ESIMS data were collected on an Agilent Single-Quad LC/MSD VL instrument at the Chemical Instrumentation Center at Boston University.

The following compounds were synthesized according to literature procedures: 5-hydroxy-2-nitroacetophenone (S1)<sup>1</sup> and ethylene glycol 2-azidoethyl ether tosylate (S2)<sup>2</sup>.

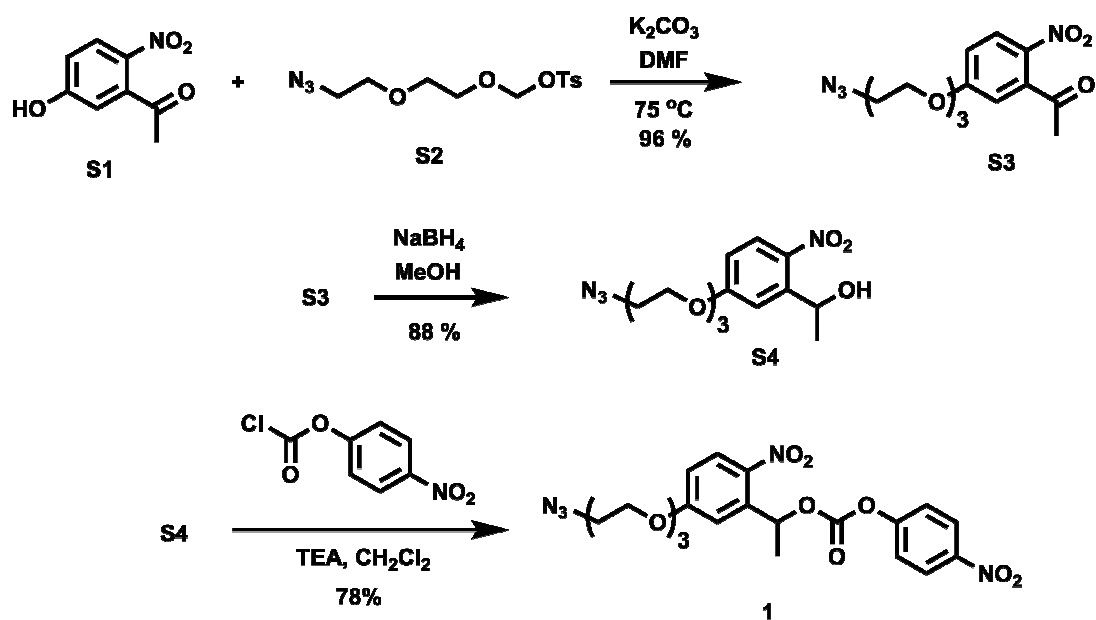

Scheme S1

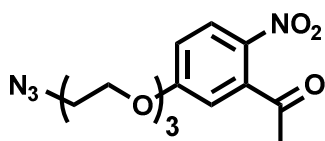

**1-(5-(2-(2-(2-azidoethoxy)ethoxy)ethoxy)-2-nitrophenyl)ethan-1-one (S3).** To a solution of 5-hydroxy-2-nitroacetophenone (2.46 g, 13.6 mmol) and ethylene glycol 2-azidoethyl ether tosylate (4.36 g, 13.2 mmol) in DMF (15 mL) was added potassium carbonate (3.77 g, 27.3 mmol), and the suspension was heated to  $75^\circ C$ . After 18 hours, the solution was concentrated in vacuo and partitioned between  $CH_2Cl_2$  (40 mL) and  $NaHCO_3$  (20 mL). The organic layer was washed with  $NaHCO_3$  (3 x 10 mL), dried over  $Na_2SO_4$ , filtered, and concentrated in vacuo to produce 4.30 g (96% crude) of **S3** as a dark brown oil that was taken on without further purification:  $^1H$  NMR (500 MHz,

DMSO-d6)  $\delta$  8.14 (d,  $J = 9.1$  Hz, 1H), 7.21 (dd,  $J = 2.8$  Hz, 9.1 Hz, 1H), 7.19 (d,  $J = 2.8$  Hz, 1H), 4.29 (m, 2H), 3.79 (m, 2H), 3.59 (m, 6H), 3.38 (m, 2H), 2.53 (s, 3H).

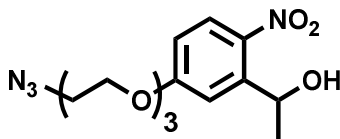

**1-(5-(2-(2-(2-azidoethoxy)ethoxy)ethoxy)-2-nitrophenyl)ethan-1-ol (S4).** To a solution of **S3** (4.12 g, 12.2 mmol) in MeOH (30 mL) stirring in an ice bath was added sodium borohydride (723 mg, 18.7 mmol) in portions. After 2 hours, the solution was concentrated in vacuo and partitioned between CH<sub>2</sub>Cl<sub>2</sub> (30 mL) and brine (20 mL). The organic layer was washed with NaHCO<sub>3</sub> (3 x 10 mL), dried over Na<sub>2</sub>SO<sub>4</sub>, filtered, concentrated in vacuo, and purified via flash chromatography (2:1 ethyl acetate : petroleum ether) to afford 3.63 g (88 %) of **S4** as a yellow oil: <sup>1</sup>H NMR (500 MHz, CDCl<sub>3</sub>)  $\delta$  8.03 (d,  $J = 9.1$  Hz, 1H), 7.37 (d,  $J = 2.8$  Hz, 1H), 6.88 (dd,  $J = 2.8$  Hz, 9.1 Hz, 1H), 5.55 (dq,  $J = 4.0$  Hz, 6.3 Hz, 1H), 4.24 (m, 2H), 3.90 (m, 2H), 3.74 (m, 2H), 3.68 (m, 4H), 3.38 (m, 2H), 2.40 (d,  $J = 4.0$  Hz, 1H), 1.54 (d,  $J = 6.3$  Hz, 3H).

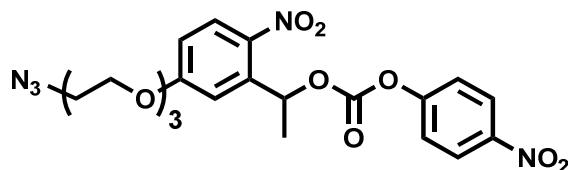

**Cross-linker (1).** To a solution of **S4** (1.88 g, 5.51 mmol) and 4-nitrophenyl chloroformate (1.65 g, 7.86 mmol) in CH<sub>2</sub>Cl<sub>2</sub> (21 mL) was added triethylamine (1.50 mL, 10.8 mmol). After stirring for 24 hours, CH<sub>2</sub>Cl<sub>2</sub> (30 mL) was added and the solution was washed with NaHCO<sub>3</sub> (20 mL), dried over Na<sub>2</sub>SO<sub>4</sub>, filtered, concentrated in vacuo, and

purified via flash chromatography (gradient from 1:3 to 2:3 ethyl acetate : petroleum ether) to afford 2.16 g (78 %) of **S4** as a tan oil: <sup>1</sup>H NMR (500 MHz, CDCl<sub>3</sub>) δ 8.26 (d, *J* = 9.3 Hz, 2H), 8.12 (d, *J* = 9.1 Hz, 1H), 7.37 (d, *J* = 9.3 Hz, 2H), 7.24 (d, *J* = 2.7 Hz, 1H), 6.95 (dd, *J* = 2.7 Hz, 9.1 Hz, 1H), 6.53 (quart, *J* = 6.3 Hz, 1H), 4.25 (m, 2H), 3.93 (m, 2H), 3.76 (m, 2H), 3.69 (m, 4H), 3.39 (m, 2H), 1.76 (d, *J* = 6.2 Hz, 3H).

### **General bioconjugate protocol (Scheme 2):**

Bioactive, amino-group containing compounds were first reacted in slight excess with Cross-linker 1 in organic solvents such as methylene chloride or dimethylformamide and trimethylamine. In cases where the starting material was insoluble, a dimethylsulfoxide/aqueous buffer mixture was used.

Carbonate intermediates were subsequently reacted with an alkyne functionalized oligonucleotide via the copper catalyzed azide alkyne cycloaddition (CuAAC) reaction using published procedures.<sup>3</sup> In brief, equal volumes of alkyne functionalized oligonucleotide (410 μM in PBS) and activated carbonate (1 mM in DMSO) were mixed. A solution of copper sulfate (10 equivalents, 20 mM in water) and tris(3-hydroxypropyltriazolymethyl)amine (THPTA) (50 equivalents, 50 mM in water) were separately mixed together and added to the reaction mixture. Lastly, a solution of sodium ascorbate (120 equivalents, 100 mM) was added and the reaction was stirred overnight. The reaction was subsequently purified via HPLC (TSKgel OligoDNA RP column, Tosoh Bioscience) using a gradient from 1:19 to 3:2 acetonitrile : 100 mM ammonium acetate over 30 minutes.

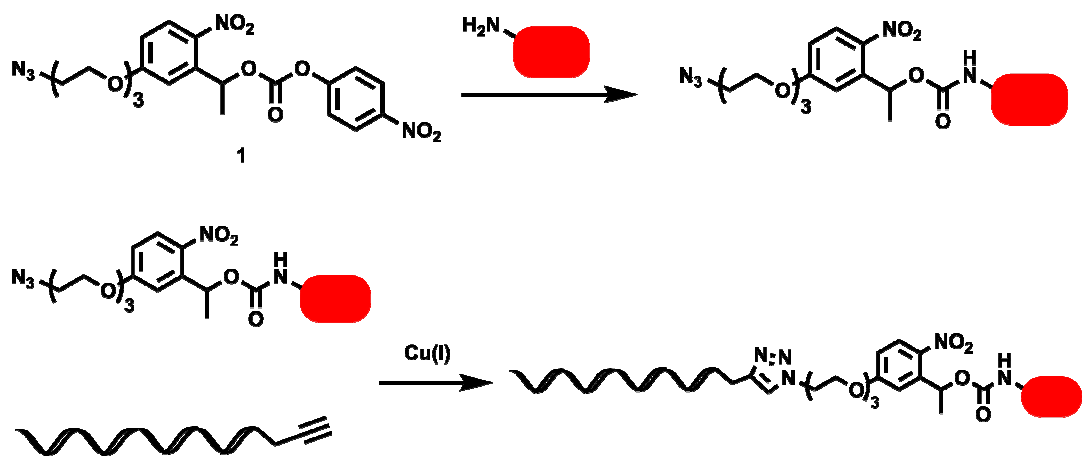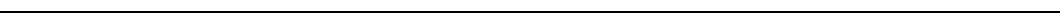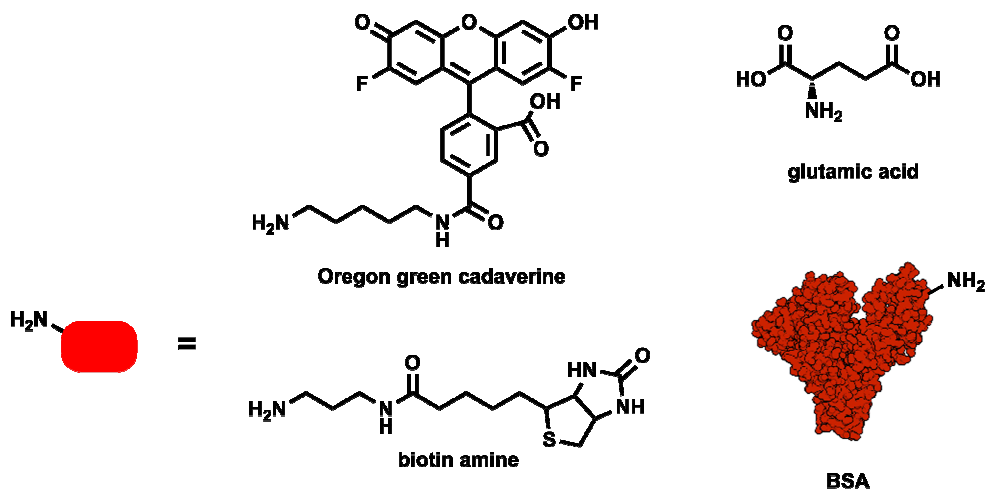

Scheme S2

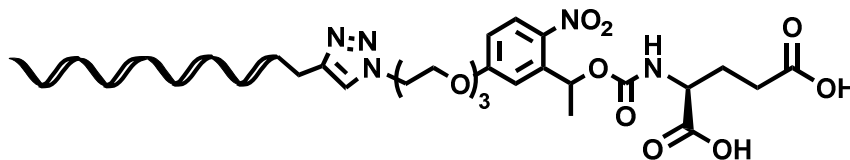

**Glutamic Acid Conjugate.** To a solution of cross-linker **1** (322 mg, 637  $\mu\text{mol}$ ) and L-glutamic acid di-tert-butyl ester hydrochloride (217 mg, 734  $\mu\text{mol}$ ) in  $\text{CH}_2\text{Cl}_2$  (6 mL) was added triethylamine (570  $\mu\text{L}$ , 4.09 mmol). After stirring for 48 hours,  $\text{CH}_2\text{Cl}_2$  (25 mL) was added and the solution was washed with  $\text{NaHCO}_3$  (2 x 15 mL). The combined aqueous layers were washed with  $\text{CH}_2\text{Cl}_2$  (2 x 10 mL). The combined organic layers were dried over  $\text{Na}_2\text{SO}_4$ , filtered, concentrated in vacuo, and purified via flash chromatography (1:2 ethyl acetate : petroleum ether) to afford 383 mg of a yellow oil. To a solution of this intermediate in  $\text{CH}_2\text{Cl}_2$  (5 mL) was added trifluoroacetic acid (700  $\mu\text{L}$ , 9.15 mmol). The solution was concentrated in vacuo and purified via flash chromatography (5% MeOH in  $\text{CH}_2\text{Cl}_2$ ) to afford 152 mg (47% over 2 steps) of product:  $^1\text{H}$  NMR (500 MHz,  $\text{DMSO-d}_6$ )  $\delta$  8.1 (dd,  $J = 2.0$  Hz,  $J = 9.0$  Hz, 1H), 7.8 (d,  $J = 8$  Hz, 1H), 7.2 (dd,  $J = 2.8$  Hz,  $J = 17.3$  Hz, 1H), 7.1 (m, 1H), 6.1 (m, 1H), 4.3 (m, 2H), 3.9 (m, 1H), 3.8 (quart,  $J = 3.2$  Hz, 2H), 3.6 (m, 4H), 3.4 (m, 2H), 2.3-2.2 (m, 2H), 2.0-1.7 (m, 2H), 1.5 (t,  $J = 6.8$  Hz, 2H), 1.4 (d,  $J = 8.5$  Hz, 3H). ESI-LRMS  $m/z$  512.1 (M-) Product molecular weight = 513.46. Azido intermediate was reacted with the oligo-alkyne using the general bioconjugate protocol and purified via HPLC to afford a solution of the product.

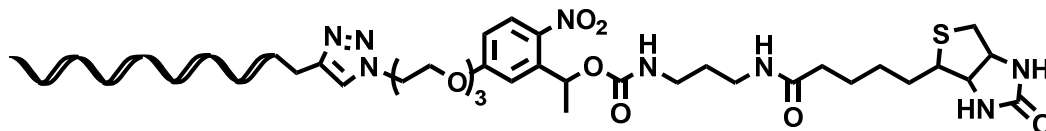

**Biotin bioconjugate.** To a solution of cross-linker **1** (103 mg, 204  $\mu\text{mol}$ ) and biotin-amine (100 mg, 234  $\mu\text{mol}$ ) in  $\text{CH}_2\text{Cl}_2$  (1 mL) and DMF (1 mL) was added triethylamine (150  $\mu\text{L}$ , 1.08 mmol). After stirring for 2 hours the solvent was removed with a stream of air.  $\text{CH}_2\text{Cl}_2$  (25 mL) was added and the solution was washed with  $\text{NaHCO}_3$  (15 mL). The aqueous layer was washed with  $\text{CH}_2\text{Cl}_2$  (10 mL). The combined organic layers were dried over  $\text{Na}_2\text{SO}_4$ , filtered, concentrated in vacuo, and purified via flash chromatography (gradient 2% to 10% MeOH in  $\text{CH}_2\text{Cl}_2$ ) to afford 109 mg (80%) of a solid:  $^1\text{H}$  NMR (500 MHz, DMSO- $d_6$ )  $\delta$  8.1 (d,  $J = 9.0$  Hz, 1H), 7.7 (t,  $J = 5.8$  Hz, 1H), 7.4 (t,  $J = 5.8$  Hz, 1H), 7.1 (m, 2H), 6.4 (s, 1H), 6.3 (s, 1H), 6.1 (quart,  $J = 6.5$  Hz, 1H), 4.2 (m, 3H), 4.21 (m, 1H), 3.8 (t,  $J = 4.5$  Hz, 2H), 3.6 (m, 4H), 3.4 (t,  $J = 5.0$  Hz, 2H), 3.1 (m, 2H), 3.0 (m, 2H), 3.0-2.8 (m, 2H), 2.6 (d,  $J = 12.5$  Hz, 1H), 2.0 (t,  $J = 7.5$  Hz, 2H), 1.5 (m, 5H), 1.6-1.2 (m, 8H). Azido intermediate (128  $\mu\text{L}$ , 2 mM in DMSO, 256 nmol) was reacted with the oligo-alkyne (120  $\mu\text{L}$ , 410  $\mu\text{M}$  in 1x PBS, 49.2 nmol) using the general bioconjugate protocol. The product was isolated by ethanol precipitation and purified via HPLC to afford 11.3 nmol as a 100  $\mu\text{L}$ , 113  $\mu\text{M}$  solution of the product.

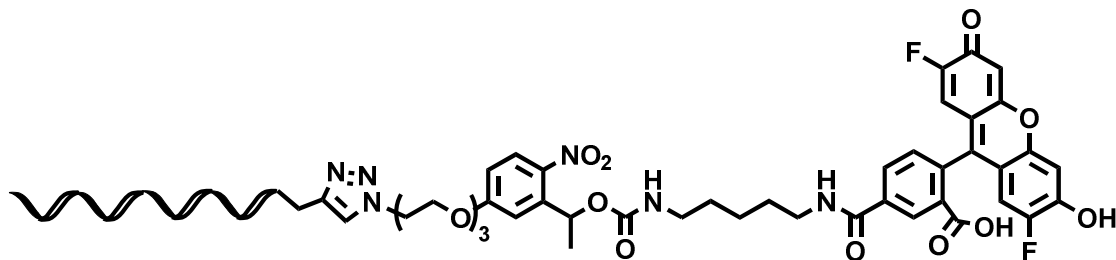

**Oregon Green Conjugate.** To a solution of cross-linker **1** (1.25 mg, 2.52  $\mu\text{mol}$ ) and Oregon Green cadaverine (1.21 mg, 2.39  $\mu\text{mol}$ ) in DMF (300  $\mu\text{L}$ ) and water (20  $\mu\text{L}$ ) was added triethylamine (20  $\mu\text{L}$ , C). After stirring overnight the solution was purified via HPLC to afford 2.39 mg an orange solid: ESI-LRMS  $m/z$  863.2 ( $M^+$ ) Product molecular weight = 862.80. Azido intermediate (150  $\mu\text{L}$ , 1 mM in DMSO, 150 nmol) was reacted with the oligo-alkyne (150  $\mu\text{L}$ , 410  $\mu\text{M}$  in 1x PBS, 61.5 nmol) using the general bioconjugate protocol and purified via HPLC to afford 38 nmol as a 200  $\mu\text{L}$ , 190  $\mu\text{M}$  solution (62%) of the product.

**BSA Conjugate.** A solution of BSA (200  $\mu\text{L}$ , 500  $\mu\text{M}$  in 1x PBS, 100 nmol) and cross-linker **1** (20  $\mu\text{L}$ , 5 mM in DMSO, 1000 nmol) in 80  $\mu\text{L}$  DMSO was mixed overnight. The reaction was centrifuged at 17000 rcf for 5 minutes to pellet insoluble materials. The supernatant was dialyzed in 1x PBS against a 25 kDa cutoff to afford 300  $\mu\text{L}$  (333  $\mu\text{M}$ ) of product. Azido intermediate (50  $\mu\text{L}$ , 333  $\mu\text{M}$  in PBS, 16.7 nmol) was reacted with the oligo-alkyne (200  $\mu\text{L}$ , 410  $\mu\text{M}$  in 1x PBS, 82 nmol) using the general bioconjugate protocol and purified using Amicon spin filters (3 spins with 30 kDa cutoff tube and 3 spins with 50 kDa cutoff tube) against buffer (5 mM Tris, 1 mM EDTA, and 16 mM  $\text{MgCl}_2$ ) to produce 50  $\mu\text{L}$  of product solution.



**Design and assembly of DNA nanostructures.** Nanostructures were designed using caDNA<sub>no</sub>.<sup>4</sup> Single stranded M13mp18 bacteriophage DNA was prepared as described previously.<sup>5</sup> All oligonucleotides were purchased from Integrated DNA Technologies (IDT) and used with no additional purification. Creation of nanostructures was performed by first heating a solution containing a final concentration of 40 nM m13 scaffold DNA and 200 nM of each staple in a folding buffer containing 5 mM Tris, 1 mM EDTA, and 20 mM MgCl<sub>2</sub> to 80°C, followed by cooling from 80°C to 60°C over 80 minutes, and then from 60°C to 24°C over 48 hours. Removal of excess staple strands was accomplished by three rounds of precipitation with polyethylene glycol solutions.<sup>6</sup> Pellets were re-dissolved in 5 mM Tris, 1 mM EDTA, and 16 mM MgCl<sub>2</sub>.

**Cavity functionalization.** Nanostructures were mixed with 70 equivalents of oligo bioconjugates (5 equivalents per handle, with 14 handles in the cavity interior) and incubated overnight at 40°C and subsequently purified by at least two rounds of PEG precipitation<sup>6</sup>.

**Gel electrophoresis.** Reaction solutions were electrophoresed on 1.5% agarose gels containing 0.5x TBE, supplemented with 10 mM MgCl<sub>2</sub>. DNA dye SybrSafe was mixed with gel solutions before loading onto the gel. The gel box was submerged in an ice water bath to prevent excessive heating.

**TEM sample preparation and imaging.** TEM samples were prepared by placing 3 μL of sample solution onto a carbon coated grid (FCF400-Cu, Electron Microscopy Sciences)

which was previously charged using a plasma etcher (30 seconds of irradiation). After 2 minutes, the solution was wicked away from the grid with filter paper (Whatman 50 hardened). The grid was immediately treated with stain for 30 seconds and excess solution was wicked away. The remaining solution on the grid was evaporated at room temperature prior to imaging. TEM images were acquired with an FEI Tecnai Spirit Transmission Electron Microscope operated at 80 kV. Saturated uranyl formate (in ddH<sub>2</sub>O prepared freshly before usage) was used for protein caging experiments and 2% uranyl acetate (diluted with ddH<sub>2</sub>O from 4%, Electron Microscopy Sciences) was used for all other samples.

**Kinetics of o-NB cleavage.** Samples of the Oregon Green cadaverine oligonucleotide bioconjugate were irradiated with a handheld UV lamp (UVM-57, 6W, 302 nm) for varying lengths of time and analyzed using HPLC (TSKgel OligoDNA RP column, Tosoh Bioscience) using a gradient from 1:19 to 3:2 acetonitrile : 100 mM ammonium acetate over 30 minutes. Irradiation durations used were 5, 10, 15, 20, 25, 30, 35, 40, and 60 seconds. A UV detector monitoring at 490 nm was used to collect traces containing Oregon Green. The degree of o-NB cleavage was obtained by comparing the areas under the peaks corresponding to the Oregon Green-oligo conjugate starting material with the released Oregon Green cadaverine (Figure S1).

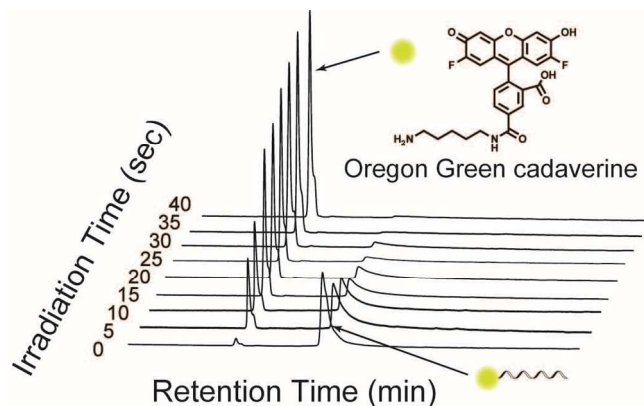

**Figure S1.** HPLC traces of Oregon Green cadaverine photolysis experiment. Increased irradiation duration results in an increase in the cleavage of Oregon Green/oligonucleotides conjugate. A wavelength of 490 nm was used to monitor traces.

**2 dye labeling experiment.** The general cavity functionalization protocol was followed but with two different oligos. 5 oligos per binding site were used. The cavity contained 14 binding sites for the activated Oregon green oligo, whereas 1 binding site on the unfolded loop was available for the Alexa Fluor 647 oligo. Reactions were incubated overnight at 40°C and subsequently purified by at least two rounds of PEG precipitation<sup>6</sup>. The final solution was analyzed using the UV setting of a Nanodrop 2000. The ratio of the dyes was obtained by comparing the concentrations of each dye in solution as calculated with Beer's law.

**Oregon Green cadaverine uncaging.** 25  $\mu$ L 2 dye labeled nanostructures was irradiated with a handheld UV lamp (UVM-57, 6W, 302 nm) for 60 seconds. The solution was placed in half of a microdialysis chamber and dialyzed against 2 L of buffer (5 mM Tris, 1 mM EDTA, and 16 mM MgCl<sub>2</sub>) overnight. The resulting solution was analyzed using the UV setting of a Nanodrop 2000.

**Protein uncaging.** Protein containing nanocages were created following the general cavity functionalization protocol. 5 equivalents per oligo handle were used. For BSA encapsulation, the BSA/oligo bioconjugate was used. For streptavidin, the nanocage was first modified with the biotin-amine/oligo bioconjugate and subsequently with streptavidin (5 equivalents per oligo handle). Each round of modification was purified using two rounds of PEG precipitation<sup>6</sup>. Uncaging experiments were performed by irradiating a PCR tube containing 5 uL of a 0.5 nM solution of protein-containing nanocage for 60 seconds with a handheld UV lamp (UVM-57, 6W, 302 nm). Samples were heated at 40°C for 30 seconds and then imaged by TEM. The extent of uncaging was analyzed using particle counting of the TEM images. The entirety of each TEM image was analyzed to avoid bias.

**Glutamate uncaging.** Glutamate containing nanocages were created following the general cavity functionalization protocol. 5 equivalents of activated glutamate/ oligo handle were used. Reactions were incubated overnight at 40°C and subsequently purified by three rounds of PEG precipitation<sup>6</sup>. For cell testing, the structures were PEG precipitated and dissolved in a modified Tyrode buffer (25 mM HEPES, 119 mM NaCl, 5 mM KCl, 2 mM CaCl<sub>2</sub>, 10 mM MgCl<sub>2</sub>, pH 7.4), at a final concentration of 180 nM. 9 days old primary rat hippocampal neurons were prepared on 12 mm diameter glass coverslides. The calcium dye Fluo-4 AM (life technologies) was dissolved in DMSO to yield a stock concentration of 2.3 mM. Neurons were loaded for 30 min in Fluo-4 AM at 2.3 uM, diluted in the modified Tyrode buffer at room temperature. Neurons were then

rinsed three times with Tyrode buffer, and incubated at 37C for another 30 min to allow complete de-esterification of intracellular AM esters. Glass coverslips were fractured into smaller pieces (approximately 1 mm<sup>2</sup>) with a pointed tungsten-carbide glass cutter to limit the use of nanocage reagents. The buffer was wicked off the surface of the fractured glass and replaced with 2 uL glutamate containing nanostructures in Tyrode. Neurons were then placed under a custom microscope with a 10x objective, equipped with a 5W LED (LZ1-00B200, 460 nm; LedEngin, San Jose CA) for excitation, an excitation filter (HQ 470/50), a dichroic mirror (FF506-Di02), an emission filter (FF01-536/40), and imaged with a Hamamatsu camera (C11440-42U) at 20 Hz. After baseline activity was collected for 5 s, the flash lamp (JML-C2, Rapp OptoElectronic GmbH, Hamburg, Germany) was triggered to deliver a light pulse for 1 ms at 240 – 400 nm, and the calcium activities of neurons were measured for another 25 s.

**Calcium signal processing.** All analysis was conducted with MATLAB (MathWorks, Massachusetts, US). Individual neurons were manually identified, and the mean fluorescence intensity averaged for all pixels within each neuron was then further processed to represent individual neuron calcium changes. Due to the saturation effects of the high intensity uncaging flash light that lasted for 6 frames (300 ms) following the light illumination, the fluorescence intensities of these 6 frames were removed and replaced by a linear fit connecting the end values that were not affected by the flash. The fluorescence of each neuron was first baseline subtracted using its linear fit for the 5 second baseline period, and then normalized by the standard deviation of the baseline and smoothed using a built-in function, Smooth, with a moving average filter with the span of

25 frames. The temporal derivative of the signal was calculated and smoothed using the moving average filter with the span of 6 frames. To screen for activated cells, we first calculated the root mean squared error (RMSE) for each 5 second intervals throughout the 30 second recording sessions, and thus 6 RMSE values were calculated. We then used the maximum RMSE of these 6 values to represent the RMSE of each neuron, and obtained the 95% confidence interval of the RMSE for the control group. We then calculated the threshold value for the instantaneous temporal derivative that would correspond to the 95% confidence interval of the RMSE. Cells were deemed as activated when their temporal derivative exceeds the threshold. To determine the onset of calcium responses, we calculated the z score of the fluorescence trace of the activated cells. Onset threshold were set as the first time point of 10 consecutive points in which the temporal derivative values had a z score bigger than 3.

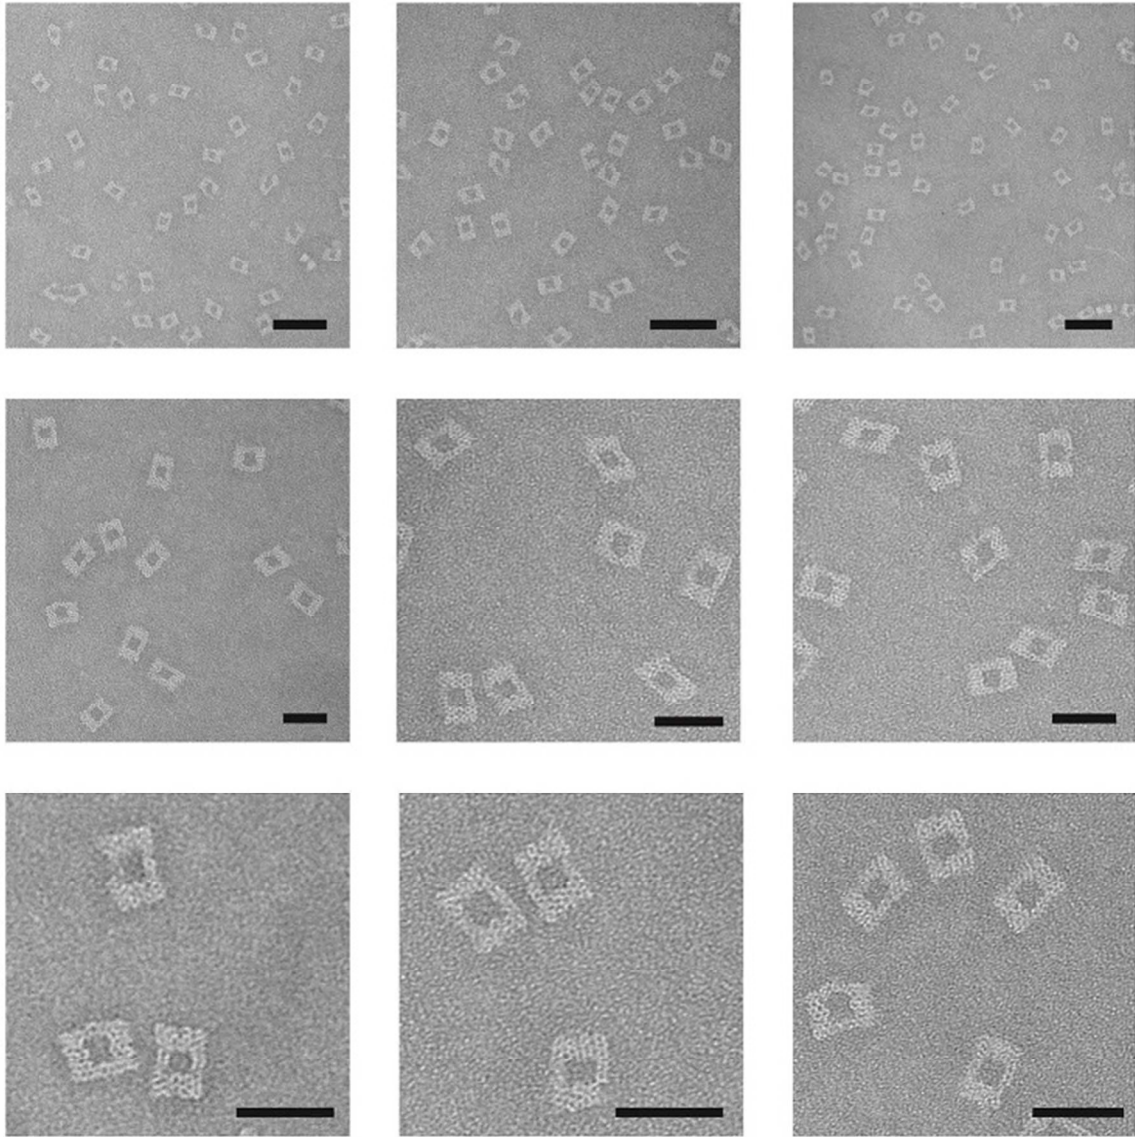

**Figure S2.** TEM images of unmodified DNA nanocage. Scale bars equal 100 nm (top three images) and 50 nm (remaining six images).

**Before Light**

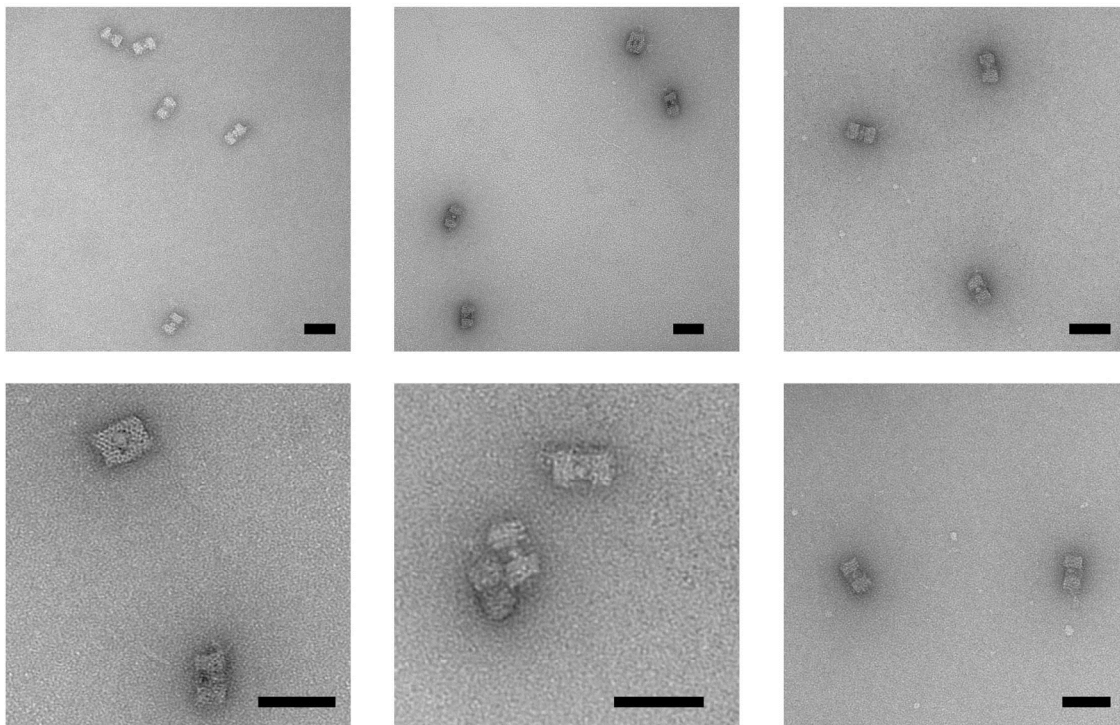

**After Light**

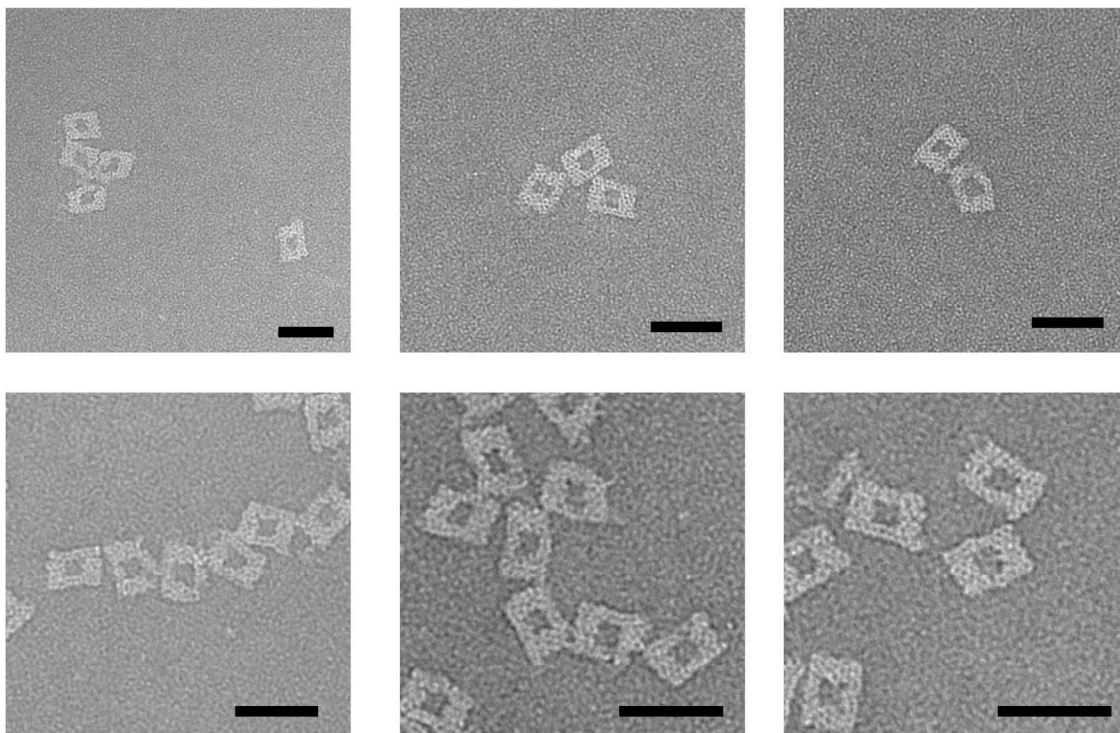

**Figure S3.** TEM images of streptavidin containing DNA nanocages before (top) and after (bottom) light irradiation. Scale bars equal 50 nm.



Before Light

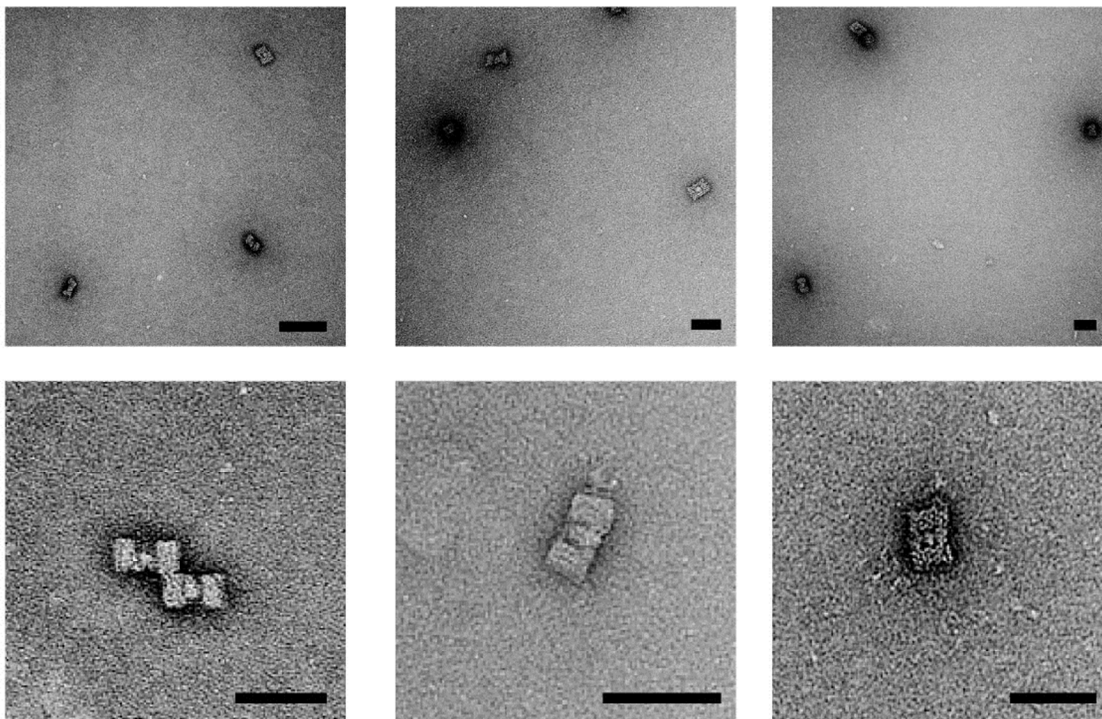

After Light

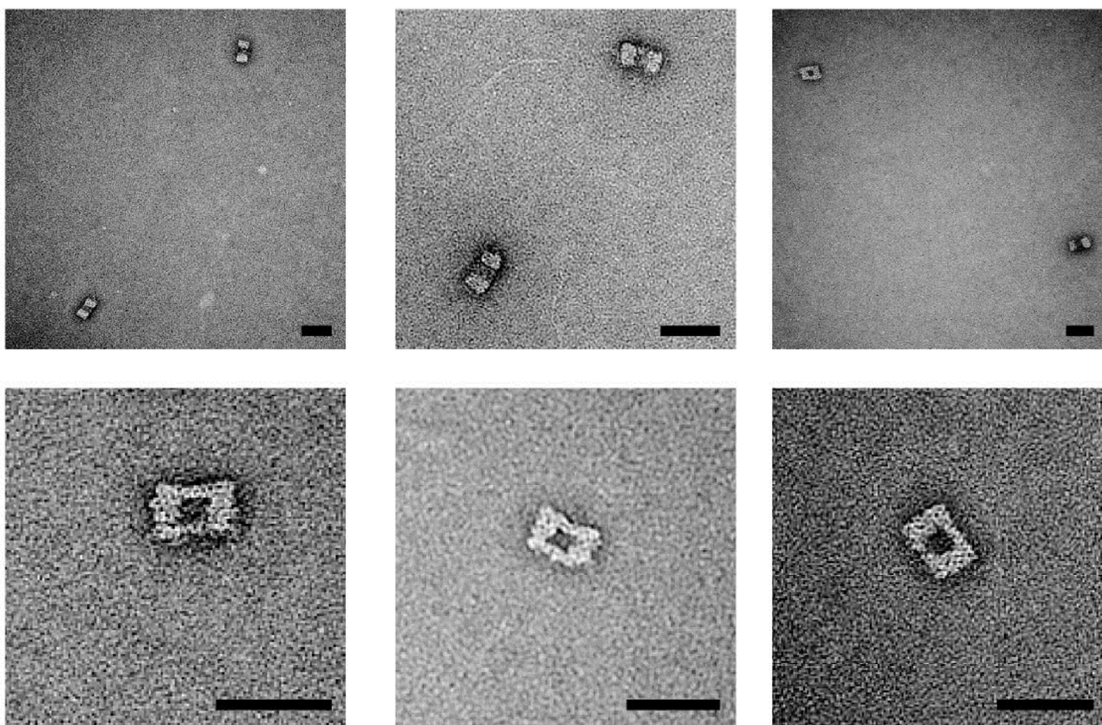

**Figure S4.** TEM images of bovine serum albumin containing DNA nanocages before (top) and after (bottom) light irradiation. Scale bars equal 50 nm.

**Video S1: Neuronal responses evoked by released glutamatic acid from DNA nanocages.** A representative video showing intracellular calcium changes in neurons loaded with calcium indicator Fluo 4, before and after flash lamp illumination in the presence of DNA nanocages containing glutamate. Video is speed up 5 times.

**Video S2: Control experiments showing lack of neuronal responses upon light illumination in the absence of DNA nanocages.** A representative video showing intracellular calcium changes in neurons loaded with calcium indicator Fluo 4, before and after flash lamp illumination, without DNA nanocages. Video is speed up 5 times.

**Staple List:**

**Center staples – those which do not come in contact with the edges of the nanostructure**

GGATTAGCAATATAAAAAGCG

AATCGTCATAAATATTCAGAATTTG

CAATAGAAAGGGCGACATTA ACTGT

CGAAAGAAGGCTTTGAGGAGCACAG

GCCCGAAATTGCATTGGAAGTGCGA

TACCTTTTTACATTACAAACATACC

ATTATCAGGAATTATCATCGTTGCCTTA

CAGACGAGCATTGAAGAACCAATGAAAC

GAAAAAGAAATCCAATCGCAGCCAGGTT

GCATGATCAAGAAAATTGAGTAAAATAG

GCTATAATGCAGTACGGATTTGGGCAAT

GGTTATACCTACCATATCAGAAGTTTG

TCCGCGACATCGCCACCTTATAGGACGT

TTTGTCAGGCAACAACGTAGAGCAACTG

ATACGTTTTAGCGAACCGAACGCCTACGCAT

TTTCCTTGAAAACAGTCAATAGTGAAGAGTGTAAC  
TAAATCATCCAGTTTGGAAAGCGCCAGGGAGCTGATTAT  
CCCTCAAGACGGAATAGGTGTAAAAGAAGGCACCAGTAA  
GATTATACATTA AAAAATACAACGAACCGTCTATCAATCA  
AAAAGCGGTTACCAGAAGGAAAGCAGATACCGAAGTTATCCC  
AAGTTTACCAGACGCAAAGAAGTTTGTGCAGACGGTCGAAA  
AATTGGGCTTAGAAACATCAGTGAAAATCAAGACAAGACAAT  
ACAAATGAATAACAGCTGCTTGCTACCAGTCGCGATTTCTTT  
ACTAAGGAATAACTAATGTTGAGAAATATATATACATTAATA  
ATGAAAATAAGGTAACCCACAAGACAATGAAATAGCTGAATT  
CATCGTATAGCACCATTACCAAGCCAGCCCGACTTAATACCC  
CCAGCTACAAGTCTTTCCATAATGGGATAGGTGCATCTGCAC  
CTGTTTACTCAACAGTAGGGCAACAGTATAAAGCCGAAA ACT  
GATGCCAGAGGGGGAATACTGCGGAAGCACGGTGTATCATAA  
GCAAATCACATCATTACCGCGCAATAGATAAGTCCCACGCGC  
GCGCGAAATTTGACCCCCAGCAAAAAGGCTCCAAAAGGTTGA  
GGCTTAAAATTTATCAAATCATAATCCTGATTCCAGATATT  
TGGGATAAAACACTCATCTCATGATACCGATAGCATAATTTT  
TTAATCATAACCGACCGGTAAAGGGCATTAAACCAAATCA  
TTTTCAAACAAGACAAAGAACAAAACAGAAATAAAAGAAAAT  
ATACGAGCCGGGAGTGAGAGGTGAGCACGCTGGAAATTGTACA  
AATTCATGAGTACAAACGCCTGGCGGGCAACTGGTTTTGCGGTTT  
ATATCAATCAAAAAACATTCGCGTCCAATAGAGCTTTCATAGCAA

CCACCACCACCGGAATCCAAAAAGGGTCTTTACCCTGATCCATAA  
GAATACACTAACGCCAAATCATAACCCTCTTTGATAAAATACCAA  
TATTTGCAGAAGATAAAACAGCTCGAACGAACCACTTGCATGCCC  
TTCTGCCGCCTCCCTCAGCCACCACCCTCATTCAAAGCAGAGGAA  
AAATCTCGCGTAACGATCTAAAGACAGCTGAGTTTCGTCACCCTAA  
ACCGTCAAAAATCACCAAGCAATAAAGCAAACATTTAGCTATGCTG  
CGCCACCCAGGAGGTTGCTCCTTTTGATAATTGCTCATCCAAATTC  
CTATCTTAGCCGAACATGAGAGTCTGGAAAAGTAGCAACCCGATCA  
TGTTTCCAACCTGTCTCACATAATATCACCAGCAGTTGAATATACC  
AATAAATACAAACAACCGATTGAGATTAAGGTGAAGATAATAGTTATT  
ACAGTTTGAGGCACTCCAGCCTCCCGACTTGTTGCTATTTTGCCATTAA  
AGAGAGCCGCTTGCCTTTAGCGTAAGATAGCAGCACCGATTATTCGGAG  
CCGACAATATTCGGTATTAATAATCGGCAAAATCCCCCAGCATCAGCAG  
GTAATATATTTGGTTTGTTAATTGATTTAGGTGAACAATGTAGAAAGAT  
TTGGTGAGAAGCTACAGCAGCATCCCACGCTGGTTTGCCTTCACCAATT  
CAAGAAAAATCTACTACAGGTTTGCTTCTTAAAAGTTTGACACAACCTCGTCCT  
AAA

**Right edge staples – those which come in contact with the right edge (when visualized in cadnano) of the nanostructure; helix ends contain TT overhangs to prevent nanostructure aggregation**

TTGACTACCTTTTTAACCTCC

TTATGAACGGTCCCGGTTGATT

TTTCATTACCCATAAGGCTTTT

TTAACCACCAGAGCCCGAGATT

TTGGGCGCATCCGACAGTATTT  
TTCCACGCATAAGTTAAAGGTT  
TTGCTCATTATTTTCGAGGTGTT  
TTTTAAATATGCATATAACATT  
TTCGGCCTCAGGCTTCTGGTTT  
TTTAATCAGAAATATTTAAATT  
TTAATTTCTTATTTCTGTATTT  
TTTAATTTCAATAAGAACTGTT  
TTAAATCGGTTTGCGGGAGATT  
TTAAGACGCTGAACAAAGATT  
TTGCCCTGACGGAGATGGTTTT  
TTAACGGAACAAACCATCGCTT  
TTGTTGATTCCACCGGATATTT  
TTAGCCTTTATCATATATTTTT  
TTGGATGGCTTCAACATGTTTT  
TTACGGCCAGTAGGATCCCCGGGT  
TTGGGATTTTGAGTACAACTACTT  
TTTGTACCAACTCAGAGCATAAAGCTTT  
CGAGTAACCGTCACGTTGGTGTAGATTT  
AACACATTATGTTAATAAAACGAACTTT  
TACAATCGTAGCAAACAAGAGAATCGTT  
TTACAACATGTTTCAGAGAACAAGCAATT  
TTGAAGCAAAGCGGAGACTTCAAATATT

TTTTGTATCGGTTTACAAAGTACAACCTT  
TTTTTGAAAGAGGACTGGCTGACCTTTT  
TTGGACTCCAACGTATCAGATGATGGTT  
TTGCCGTTTTTTATTTTGTTAAATCAGTT  
TTTAGGGTTGAGTGTTGTAAAGAATAAGG  
TTTCAACCGTTCTATTTTGAGAGATCTT  
TTCTAAAACATCGCCTTCTGAATAATTT  
TTTTTCCAGACGTTAGGAGCCTTTAATT  
TTGGAGATTTGTATCCTGCTCCATGTTT  
TTCATCAAGAGTAACTATTATAGTCATT  
TTAAATGCTGATGCCCTGTTTAGTATTT  
TTTACTTAGCCGGAGAACTGACCAACTT  
TTTTCGCAAATGGTGCGCGAGCTGAATT  
TTAAGGTGGCATCATAAATCATACAGTT  
TTTCGCGTTTTAATACTCCAACAGGTTT  
TTTAGCCAGCTTTCTCGGATTCTCCGTT  
TTCATATGCGTTATCGACGACAATAATT  
TTCAATTCATCAATATAGGTCTGAGATT  
TTGGAAGGGTTAGAATAACTATATGTTT  
TTACGTTATTAATTTGTAAATCGTCGTT  
TTGGTGGTTCCGAATCCTTTGCCCGATT  
TTCTCATTTTTTAACTGGCCTTCCTGTT  
TTAAGATTTAGTTTGACCATTAGATACATTT

AGCTTTTGC GGAGAAGATAGCGATAGCTTAGATTT  
TTCCGCTTTTGC GGGATCTGCAGGGACCGATATGAC  
TTAACGCCTGTAGCATTCCACAGTTTTGTCGTCTT  
TTGCCGGAACCAGGCCACGGCACCGAAGATCGGGA  
TTTTGTAAACGTTAATATTAAGCAAAGCCCCTATG  
TTTACCGAGCTCGAATTCGTAGAACTGATAGCCTT  
TTTAAATGCAATGCCTGAGAACCCTTCAACGATAC  
TTCAAGGCGATTAAGTGTGCAGGGGGATGTGCTGTT  
TTCATTCAGGCTGCGCAACCAAAGCGCCATTCGCTT  
TTGTTTTCCAGTCACGCACTGGGTAACGCCAGGTT  
TACCCCTGTACAAGGATTACACCATCAATATGATATTT  
TTCGCCAGCTGGCGAAGAAACCTCTTCGCTATTATT  
TTGCGATCGGTGCGGGCGTCAACTGTTGGGAAGGTT  
TGGCAGGTCGACTCTAGGCCAAGCCAGACGTTGTAAAACGTT  
TTTGGGAACAAACGGCGGATTGACCGGACGAGTAACAAATAG  
TTTACAAAGGCTATCAGGTCATTGCCAAGAGAGGGATTTATC  
TTGCAAGGCAAAGAATTAGCAA AATTAGGCATTAAGAAGAGC  
TTCAGGATTAGAGAGTACCTTTAATTGACAGACCGGAAGCAATCGA  
TTCACTAACTTTCATGAGGCTGTCACCCGGCGAAAATCCTGTTTGATTT  
TCTTTCATTCCA ACTAATGTAGCTAGAGCTTAAGAGGTCATTTTTGCTT  
CCTGATTCAAAGGGCGAAATGGGCAAGAGTCCACTATTAAGAACGTTT  
TTCTATTAATTAATTTCCCTTAGAACAAATAACCAGAAAGAGCTTGCG  
TGAACACATATCAGAGAGAAATAAAGGTCATAAAGATTCAA AAGGGTGAGA  
AAGTT

**Left edge staples – those which come in contact with the left edge (when visualized in cadnano) of the nanostructure; helix ends contain TT overhangs to prevent nanostructure aggregation**

TTACCACATTCTACGAGGCATT

TTATTAAACGGACCTAAAACCTT

TTAGGAGGTTTAGTACCGCCA

TTGTAGCAACGTAGAAAGGATT

TTTTCTAAGAAATAACATAAAAATT

TTGCATTTTCGGTCATAATCAAATT

TTACCAACGCTTTACAAAATAAATT

TTCTAACAACCTTGAGGATTTAGATT

TTCAGTGAGACCCTGAGAGAGTTTT

TTAATCAACAGTTGTTAGGAGCATT

TTCAGCCATATTATCCCTTTTTTATT

TTCTTAAATCAATTTTTTTGTTTATT

TTCCGCCTGCAAAAATCTAAAGCTT

TTAGTACATAAATCTTTAGGAATTT

TTGCAGCAAGCGGTGGAACGAGGTT

TTACAGAATCAAGTCACCCTCAGTT

TTAGACTGGATTCGGAACCTATTTT

TTTTGACGGAATAATCAGTAGCGTT

TTCCGCCGCCATTGGCCTTGATATT

TTTAGTAAGAGATAAGTGCCGTCTT



TTCAATAATAACGGGAGCCATTTTT  
TTCAAATGCTTGCCTTGAGTAACTT  
TTGAAACGTCACCACCACCAGAGTT  
TTAACCGCCACGAAAGCGCAGTCTT  
TTTTACGCAGTATGAGGTAAATATT  
TTTAGCGAGAGCTCAAGAGAAGGTT  
TTGGGTAATTGGAAACGCAAAGATT  
TTACAACGCCAAGTAATAAGAGATT  
TTCAGGGAAGCGCAAAGTCAGATT  
TTGAAAGAGGCATCACCGTACTCTT  
TTCCAGCGCCAGCGTTTTTCATCGTT  
TTAGTATTAGACTTGAAGTTTCCTT  
TTCACCACGGAATATATGGTTTATT  
TTTCCTAATTTGTCTTTCCTTATTT  
TTGCGCGGGGAGAGTCTTTTCACTT  
TTAGAAAAGTAACCGAGGAAACGTT  
TTCAAATAATTTAATGGAAACTT  
TTTAACGTCAGGGAGAAACAATATT  
TTATTCATTTCAATTCAAGAAAATT  
TTGGGAATTAGTTAGCAAGGCCGTT  
TTACGTCAAAAATGTAAGCCCAATT  
TTGCCTGGGGTGTTGCGCTCACTTT  
TTATCACCGGATTTTGATGATACTT

TTACA ACTAAACTCAGAACCGCCTT  
TTTCTGACCTAAAATAAGGCGTTTT  
TTTAATAAGAGTAAGACTCCTTATT  
TTACGGATTTCGCTCAGAGGCGAATTTT  
TTGCCCGCTTCCAGAATCGGCCAACTT  
TTATCACCTTGCTGGGTCAGTTGGCATT  
GCCTATTAGCGTCCTAATAGTAAAATGTTTTT  
GGTCAGTTAAACAGTTCATTGAATCCCCCTTT  
GAGACTCGCTTTTGACGATAAAAACCAAATT  
TTTTATCCGCTCACAATTCCACACAATGTCATAGC  
TTATTCTGAAACATGAAAGTATTAAGCAACCCCCT  
TTTTCACAAACAAATAAATCCTCATTACGGCAGGT  
TTAGGAGTGTACTGGTAATAAGTTTTCAATGTCAT  
TTATTAGGATTAGCGGGGTTTTGCTCGTGTAGGCT  
TTAGTGCCCGTATAAACAGTTAATGCAGATAACGG  
TTTGTAACACCCTCATAGTTTCAGGGATAGCAAGCCTT  
TTCAATAGGAACCCATGTACCCAGCGGACGAATAACTAC  
GATAATATCTAAAGGAACATTAATGTCGGGATGTGTGAAATTGTT  
CAGCCCATGAAATAAGAAACGAGATTAGCGGGAGGTTTTGAAGCTT  
AATCCAGGCCTAATTTGCCAGAACGAGCTTTTATCCTGAATCTTTT  
AATCGCGGATTGCTCAAATGAACAGTGCGCGGTCAGTATTAACATT  
TTACCCTCAGAGCCACCACCCTCATTTACAAGAACCGCCACCGGAA  
TTTCTGAATTTACCGTTCCAGTAAGCTAGAAAAGCCAGAATGCCTC

TTGAGAGGGTTGATATAAGTATAGCCTTTTAGTACCAGGCGGCAAC  
TGAAATATCTAACCTCATAATTGCGCCTAATAAGCATAAAGTGTAATT  
ATAGGAGAATATTTTACAGAGAGACGCGAGGGAAGGCTTATCCGGTATT  
CTACCTGAACTTAGACGATCGGCTACGAGCAGAAAAATAATATCCCATT  
TTAATAAGAATAAACACCGGTACATCGATGAATACGTAGATTTTCAGGTTTT  
TTATATAAAGTACCGACAAAAGTGTGATAATTTAATTAGTTAATTTTCATCTTT  
TTCATTCCAAGAACGGGTATTTTCGAGCCACATGTAAGAATCGCCATATTTATT

**Cavity staples – those which protrude into the cavity of the nanostructure exposing  
AAAAAAAAAAAAAAAA handles**

AACATTTTTAGTAATGTGTAGGATGAAAAAAAAAAAAAAAA  
CGAATAGATAGTGAGTGTGTTGAATGAAAAAAAAAAAAAAAA  
CTAATAGAGCCTGATGAATAACAATGAAAAAAAAAAAAAAAA  
ACATGGCACCAGAGTCTTTTCATAGCCCGAAAAAAAAAAAAAAAA  
GACTTTTACGTAATTTTCATCAGCAGATAGAAAAAAAAAAAAAAAA  
GGGAACCACGAGGCAGTAAATCATTGTGGAAAAAAAAAAAAAAAA  
ACTCATCGCTAATGCAGAAGATAATTCTCAAAAAAAAAAAAAAAAA  
GTCCAGAACAATTCTTACATATTACTACAAAAAAAAAAAAAAAA  
TAAATTTTTCATCGTAGGACAGTACCGCGAAAAAAAAAAAAAAAA  
ACGAGTAGCGAACGAGAATGACTTCGTAACAGAAAAAAAAAAAAAAAA  
GCGTATTCCAGCTGTTGAGGACTCAATCGCAAAGGTTACAAGAAAAAAAA  
AAAAAA  
ATCAAAAACCAGGCGCATAGGCAGATGATGCTCATCCAGAACCAAAAAAAA  
AAAAAA  
CCTTATTGCTCAGACTGTAGCAAGACAAAATTCAAGTTTATGAAAAAAAA  
AAAAAA

TTGCCGGAGACAGTCAAATCAGATTGTATTTGTTAAAATTACGAAAAAAAAA  
AAAAAA

### **Cavity binding oligo**

/5Hexynyl/TTTTTTTTTTTTTTTT

### **Loop binding oligo**

/5Alex647N/TGAGTAGAAGAAGAACTCAAACCTATCGGCCTTGCTGGTAATAT

### **References:**

- 1 Griffin, D. R. & Kasko, A. M. *Photodegradable Macromers and Hydrogels for Live Cell Encapsulation and Release. J. Am. Chem. Soc.* **134**, 13103-13107 (2012).
- 2 Deng, L., Norberg, O., Uppalapati, S., Yan, M. & Ramstrom, O. Stereoselective synthesis of light-activatable perfluorophenylazide-conjugated carbohydrates for glycoarray fabrication and evaluation of structural effects on protein binding by SPR imaging. *Org. & Biomol. Chem.* **9**, 3188-3198 (2011).
- 3 Hong, V., Presolski, S. I., Ma, C. & Finn, M. G. Analysis and Optimization of Copper-Catalyzed Azide-Alkyne Cycloaddition for Bioconjugation. *Angew. Chem. Int. Ed.* **48**, 9879-9883 (2009).
- 4 Douglas, S. M. *et al.* Rapid prototyping of 3D DNA-origami shapes with caDNAno. *Nucleic Acids Res.* **37**, 5001-5006 (2009).
- 5 Sambrook, J. *Molecular Cloning : A Laboratory Manual*. 3rd ed. edn, (Cold Spring Harbor Laboratory Press, 2001).
- 6 Stahl, E., Martin, T. G., Praetorius, F. & Dietz, H. Facile and Scalable Preparation of Pure and Dense DNA Origami Solutions. *Angew. Chem. Int. Ed.* **53**, 12735-12740 (2014).
